# Supplementary figures and images for: 3D binary silver(I) 1,2,4-triazolates: syntheses, structures and topologies
Source: Royal Society of Chemistry journal article supplement (doi:10.1039/b813024h), 2009-01-01

**Figure S1. TG and DSC curves of the complexes.**

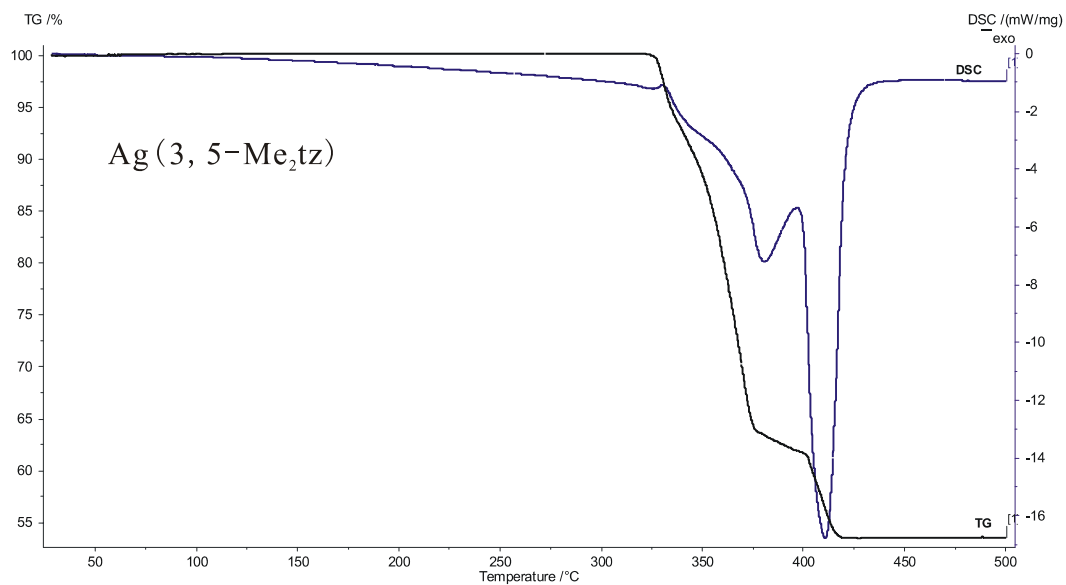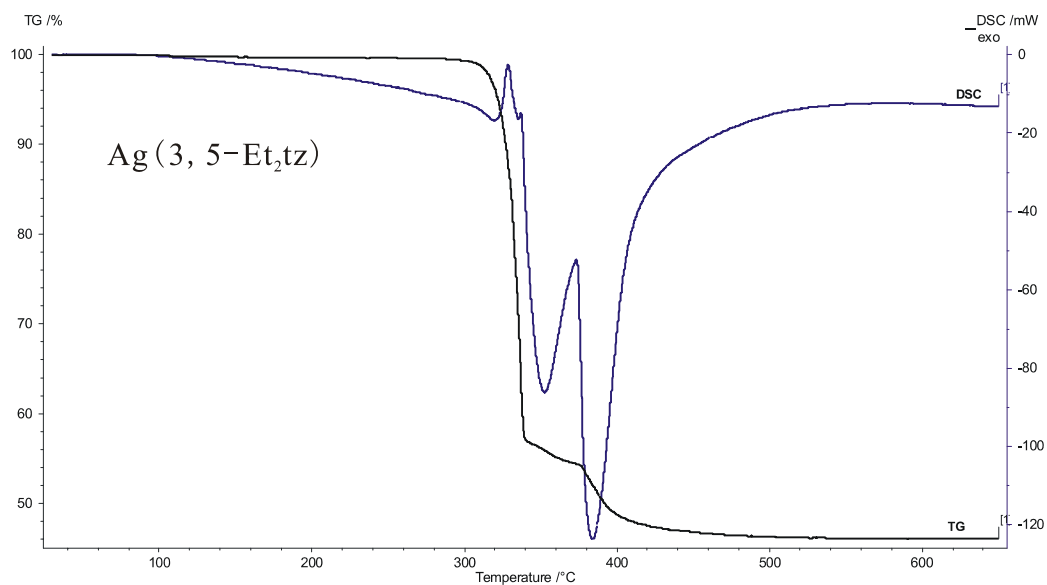

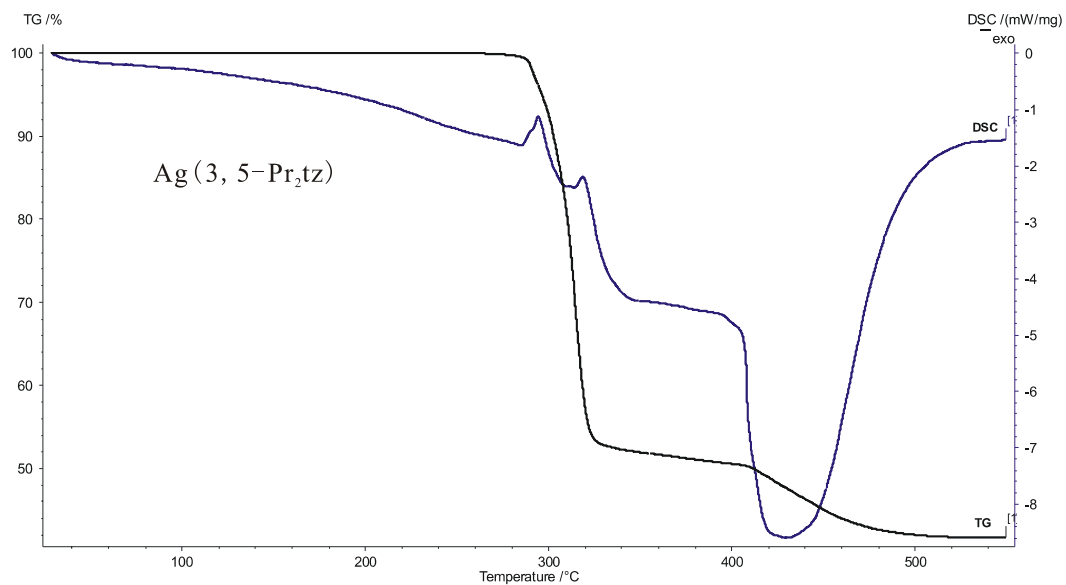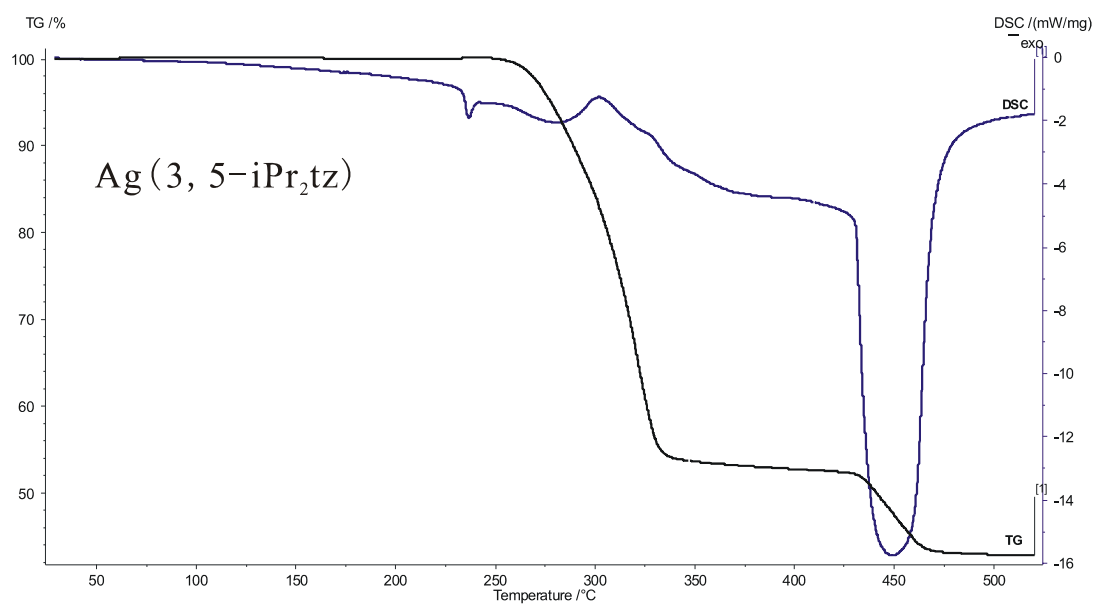

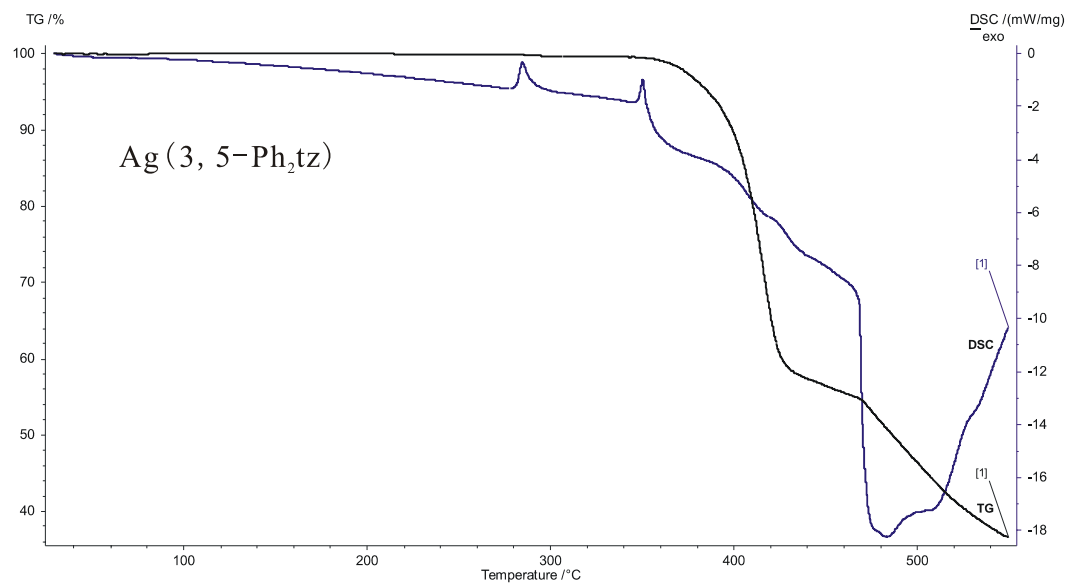

Supplement: b813024h.pdf [file b813024h.pdf]
